# Supplementary material
Source: Springer Nature journal article supplement (https://www.springermedizin.de/resource/supplementary/12943_2010_780_MOESM2_ESM.pdf/9554802)

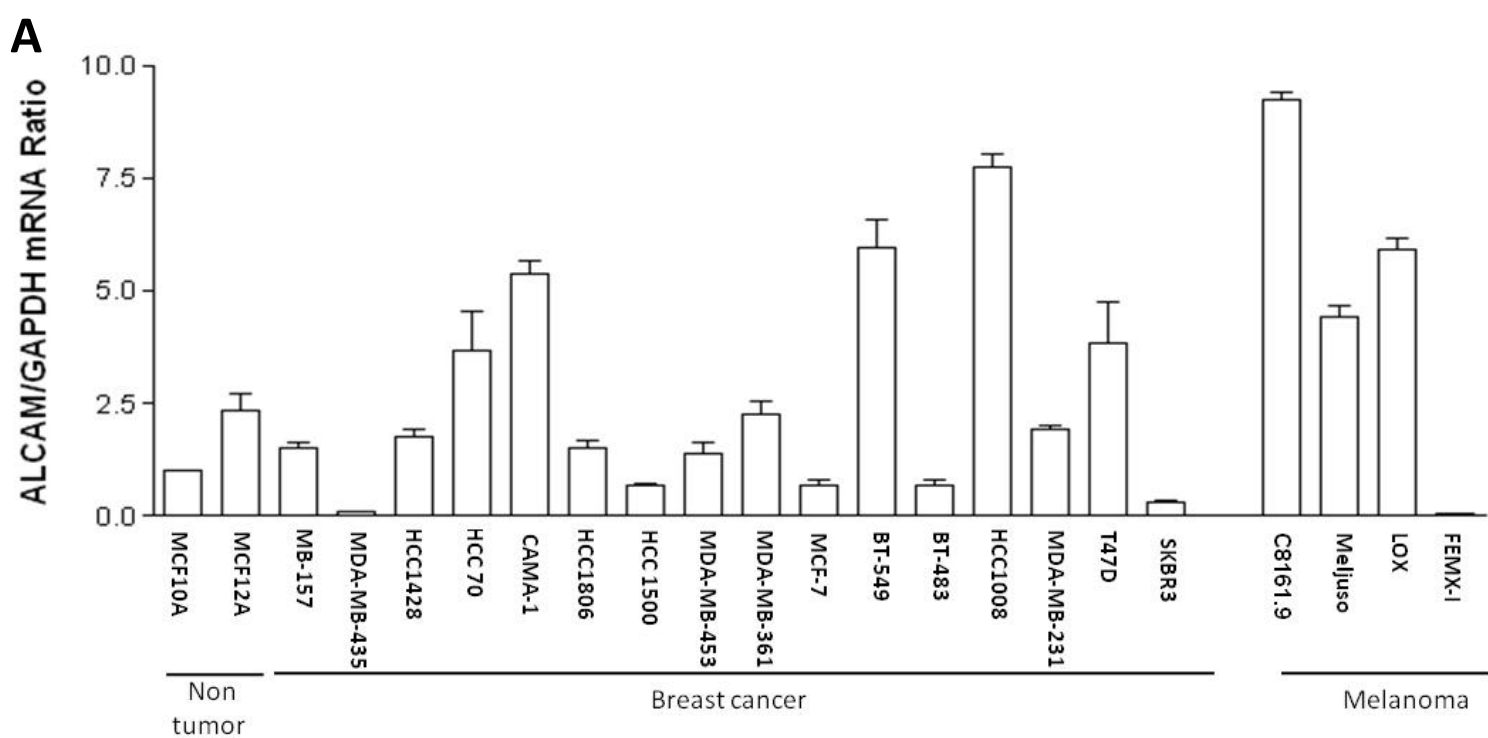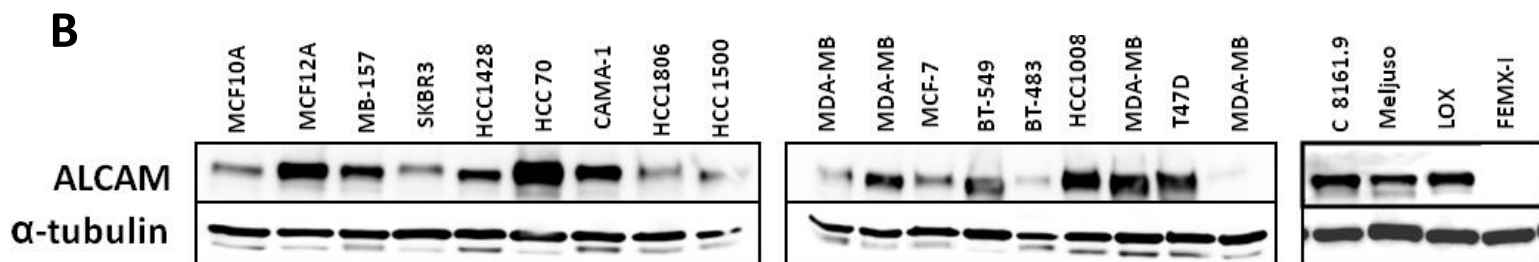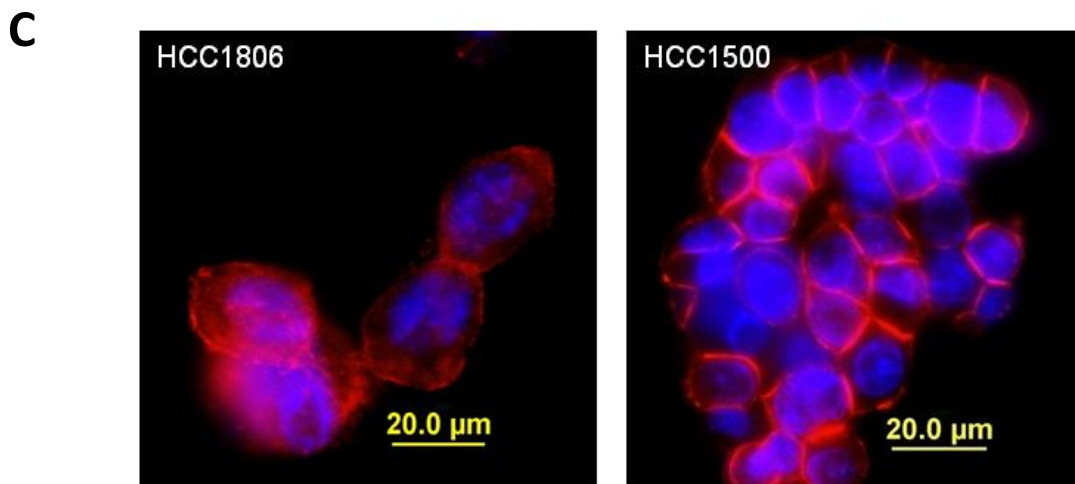

ALCAM=red; Nucleus=blue

Supplement: MOESM2 [file 9554802]
